# Supplementary material for: Rotational characterization of S⋯F chalcogen bonds in the complex of 2,2,4,4-tetrafluoro-1,3-dithietane and difluoromethane
Source: Royal Society of Chemistry journal article supplement (doi:10.1039/c9cp04628c), 2019-01-01
Supplement: c9cp04628c1.pdf [file c9cp04628c1.pdf]

## Electronic Supplementary Information†

### Rotational characterization of a S⋯F chalcogen bond in the complex of 2,2,4,4-tetrafluoro-1,3-dithietane and difluoromethane

Tao Lu,<sup>a</sup> Yang Zheng,<sup>a</sup> Qian Gou,<sup>\*a</sup> Gao-Lei Hou,<sup>\*b</sup> and Gang Feng<sup>\*a</sup>

<sup>a</sup> School of Chemistry and Chemical Engineering, Chongqing University, Daxuecheng South Rd. 55, 401331, Chongqing, China.

<sup>b</sup> Department of Physics and Astronomy, KU Leuven, Celestijnenlaan 200D, 3001 Leuven, Belgium.

### Table of Content

**Fig. S1.** The MP2/6-311++G(d,p) calculated equilibrium structures of the observed conformer of C<sub>2</sub>F<sub>4</sub>S<sub>2</sub>-DFM dimer in the *ab*-, *ac*-, and *bc*-planes.

**Table S1.** *Ab initio* and DFT predictions for the structure of conformer I of C<sub>2</sub>F<sub>4</sub>S<sub>2</sub>-DFM in the principal inertial axis system.

**Table S2.** *Ab initio* and DFT predictions for the structure of conformer II of C<sub>2</sub>F<sub>4</sub>S<sub>2</sub>-DFM in the principal inertial axis system.

**Table S3.** Experimental transition frequencies of the observed parent species of C<sub>2</sub>F<sub>4</sub>S<sub>2</sub>-DFM.

**Table S4.** Measured transition frequencies of the three observed <sup>13</sup>C isotopic species of C<sub>2</sub>F<sub>4</sub>S<sub>2</sub>-DFM.

**Table S5.** Measured transition frequencies of the two observed <sup>34</sup>S isotopic species of C<sub>2</sub>F<sub>4</sub>S<sub>2</sub>-DFM.

**Table S6.** Experimental (*r<sub>s</sub>* and *r<sub>0</sub>*) and theoretical (*r<sub>e</sub>*) coordinates of the three C and two S atoms for the observed conformers of C<sub>2</sub>F<sub>4</sub>S<sub>2</sub>-DFM.

**Table S7.** The *r<sub>0</sub>* structure of conformer I of C<sub>2</sub>F<sub>4</sub>S<sub>2</sub>-DFM in the principal inertial axis system.

**Table S8.** Stabilization energy contributions (≥ 0.21 kJ mol<sup>-1</sup>) for conformer I of the C<sub>2</sub>F<sub>4</sub>S<sub>2</sub>-DFM complex.

**Table S9.** NPA charge distributions for conformer I of C<sub>2</sub>F<sub>4</sub>S<sub>2</sub>-DFM complex, and isolated C<sub>2</sub>F<sub>4</sub>S<sub>2</sub> and DFM molecules.

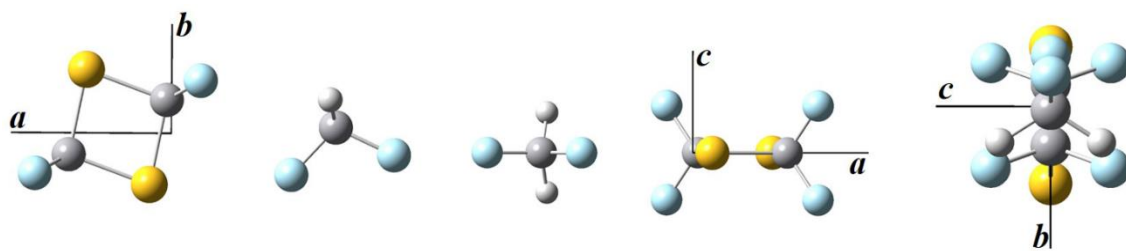

**Fig. S1** The MP2/6-311++G(d,p) calculated equilibrium structures of the observed conformer of  $C_2F_4S_2$ -DFM dimer in the  $ab$ -,  $ac$ -, and  $bc$ -planes.

**Table S1.** *Ab initio* and DFT predictions for the structure of conformer I of C<sub>2</sub>F<sub>4</sub>S<sub>2</sub>-DFM in the principal inertial axis system (MP2/6-311++G(d,p) and B3LYP-D3(BJ)/def2-TZVP).

|        | <i>a</i> / Å |              | <i>b</i> / Å |              | <i>c</i> / Å |              |
|--------|--------------|--------------|--------------|--------------|--------------|--------------|
|        | MP2          | B3LYP-D3(BJ) | MP2          | B3LYP-D3(BJ) | MP2          | B3LYP-D3(BJ) |
| C (1)  | 2.1671       | 2.1809       | -0.4513      | -0.4772      | -0.0001      | 0.0000       |
| F (2)  | 2.8813       | 2.8835       | -0.8461      | -0.8878      | 1.0751       | 1.0749       |
| F (3)  | 2.8805       | 2.8836       | -0.8460      | -0.8878      | -1.0758      | -1.0748      |
| S (4)  | 1.8041       | 1.8439       | 1.3303       | 1.3207       | 0.0001       | 0.0000       |
| C (5)  | 0.1027       | 0.1137       | 0.7012       | 0.7425       | 0.0001       | 0.0000       |
| F (6)  | -0.6123      | -0.5904      | 1.1098       | 1.1648       | 1.0745       | 1.0745       |
| F (7)  | -0.6121      | -0.5904      | 1.1093       | 1.1648       | -1.0749      | -1.0745      |
| S (8)  | 0.4620       | 0.4466       | -1.0754      | -1.0502      | 0.0005       | 0.0000       |
| F (9)  | -2.5353      | -2.5946      | -0.8544      | -0.9249      | 0.0002       | 0.0000       |
| C (10) | -3.4705      | -3.4840      | 0.1446       | 0.1167       | -0.0001      | 0.0000       |
| H (11) | -3.3486      | -3.3353      | 0.7264       | 0.6948       | 0.9123       | 0.9119       |
| H (12) | -3.3484      | -3.3353      | 0.7260       | 0.6948       | -0.9128      | -0.9119      |
| F (13) | -4.7020      | -4.7412      | -0.4278      | -0.3993      | -0.0001      | 0.0000       |

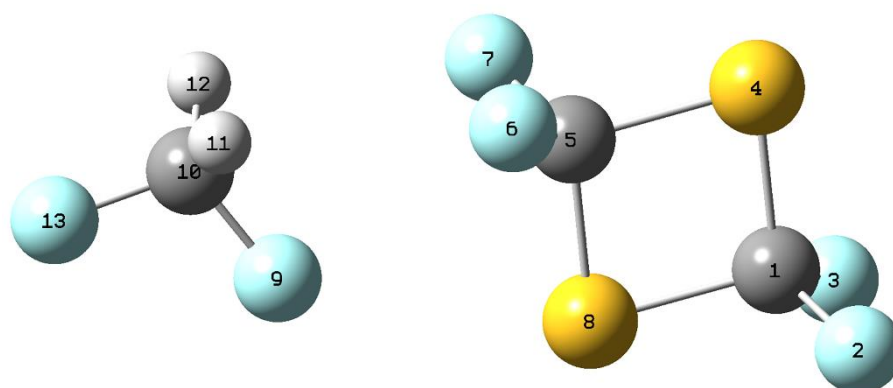

**Table S2.** *Ab initio* and DFT predictions for the structure of conformer II of C<sub>2</sub>F<sub>4</sub>S<sub>2</sub>-DFM in the principal inertial axis system (MP2/6-311++G(d,p) and B3LYP-D3(BJ)/def2-TZVP).

|        | <i>a</i> / Å |              | <i>b</i> / Å |              | <i>c</i> / Å |              |
|--------|--------------|--------------|--------------|--------------|--------------|--------------|
|        | MP2          | B3LYP-D3(BJ) | MP2          | B3LYP-D3(BJ) | MP2          | B3LYP-D3(BJ) |
| C (1)  | 3.5742       | 3.6007       | 0.0534       | 0.0379       | -0.2551      | -0.3307      |
| H (2)  | 4.4832       | 4.4033       | 0.2787       | 0.1639       | -0.8123      | -1.0584      |
| H (3)  | 3.2920       | 3.1840       | -0.9978      | -0.9684      | -0.2740      | -0.3055      |
| C (4)  | -0.0144      | -0.0514      | -0.7234      | -0.7495      | -0.0945      | -0.0819      |
| C (5)  | -2.0624      | -2.1151      | 0.4465       | 0.4663       | 0.0871       | 0.0865       |
| S (6)  | -0.3918      | -0.4019      | 1.0382       | 1.0377       | -0.3039      | -0.1834      |
| S (7)  | -1.6827      | -1.7620      | -1.3174      | -1.3248      | 0.3056       | 0.1920       |
| F (8)  | -2.9568      | -2.9544      | 0.6777       | 0.7859       | -0.8982      | -0.9198      |
| F (9)  | -2.5866      | -2.6797      | 1.0165       | 0.9656       | 1.1933       | 1.2046       |
| F (10) | 0.5010       | 0.5096       | -1.3033      | -1.2585      | -1.2018      | -1.2009      |
| F (11) | 0.8834       | 0.7904       | -0.9694      | -1.0806      | 0.8864       | 0.9217       |
| F (12) | 2.5515       | 2.5970       | 0.7845       | -0.9141      | -0.7936      | -0.6461      |
| F (13) | 3.7403       | 4.0702       | 0.4431       | -0.3543      | 1.0344       | 0.9044       |

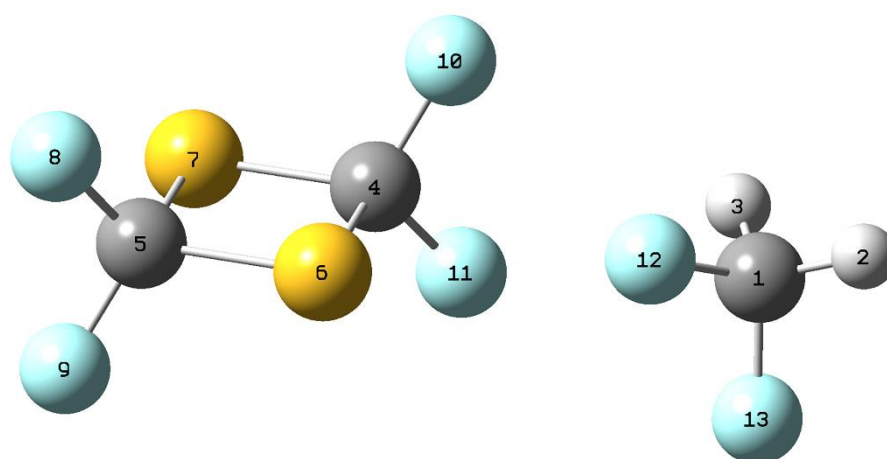

**Table S3.** Experimental transition frequencies of the observed parent species of C<sub>2</sub>F<sub>4</sub>S<sub>2</sub>-DFM.

| <i>J'</i> | <i>K<sub>a</sub>'</i> | <i>K<sub>c</sub>'</i> | <i>J''</i> | <i>K<sub>a</sub>''</i> | <i>K<sub>c</sub>''</i> | <i>v</i> <sub>obs</sub> /MHz | $\Delta v_{\text{obs-calc}}$ /MHz |
|-----------|-----------------------|-----------------------|------------|------------------------|------------------------|------------------------------|-----------------------------------|
| 2         | 2                     | 1                     | 1          | 1                      | 0                      | 5597.2285                    | 0.0014                            |
| 2         | 2                     | 0                     | 1          | 1                      | 1                      | 5628.1781                    | 0.0010                            |
| 3         | 2                     | 2                     | 2          | 1                      | 1                      | 6315.4595                    | 0.0009                            |
| 3         | 2                     | 1                     | 2          | 1                      | 2                      | 6409.3254                    | 0.0045                            |
| 3         | 3                     | 1                     | 2          | 2                      | 0                      | 9104.2718                    | 0.0005                            |
| 3         | 3                     | 0                     | 2          | 2                      | 1                      | 9104.7832                    | -0.0001                           |
| 4         | 2                     | 3                     | 3          | 1                      | 2                      | 7018.3892                    | -0.0001                           |
| 4         | 2                     | 2                     | 3          | 1                      | 3                      | 7208.6414                    | 0.0077                            |
| 4         | 3                     | 2                     | 3          | 2                      | 1                      | 9851.9061                    | -0.0016                           |
| 4         | 3                     | 1                     | 3          | 2                      | 2                      | 9854.4766                    | -0.0005                           |
| 4         | 4                     | 1                     | 3          | 3                      | 0                      | 12596.4721                   | 0.0012                            |
| 4         | 4                     | 0                     | 3          | 3                      | 1                      | 12596.4721                   | -0.0041                           |
| 5         | 3                     | 3                     | 5          | 2                      | 4                      | 6862.9230                    | 0.0012                            |
| 5         | 3                     | 2                     | 5          | 2                      | 3                      | 6845.3867                    | -0.0009                           |
| 5         | 4                     | 2                     | 5          | 3                      | 3                      | 9600.1949                    | -0.0022                           |
| 5         | 4                     | 1                     | 5          | 3                      | 2                      | 9600.0507                    | 0.0008                            |
| 5         | 2                     | 4                     | 4          | 1                      | 3                      | 7706.0713                    | -0.0001                           |
| 5         | 2                     | 3                     | 4          | 1                      | 4                      | 8028.1470                    | 0.0010                            |
| 5         | 3                     | 3                     | 4          | 2                      | 2                      | 10597.5866                   | -0.0015                           |
| 5         | 3                     | 2                     | 4          | 2                      | 3                      | 10605.3244                   | -0.0021                           |
| 5         | 4                     | 2                     | 4          | 3                      | 1                      | 13345.2173                   | -0.0004                           |
| 5         | 4                     | 1                     | 4          | 3                      | 2                      | 13345.2588                   | 0.0038                            |
| 5         | 5                     | 1                     | 4          | 4                      | 0                      | 16088.2933                   | -0.0008                           |
| 5         | 5                     | 0                     | 4          | 4                      | 1                      | 16088.2933                   | -0.0009                           |
| 6         | 3                     | 4                     | 6          | 2                      | 5                      | 6867.8280                    | 0.0007                            |
| 6         | 3                     | 3                     | 6          | 2                      | 4                      | 6833.0102                    | 0.0005                            |
| 6         | 4                     | 3                     | 6          | 3                      | 4                      | 9599.2576                    | 0.0003                            |
| 6         | 4                     | 2                     | 6          | 3                      | 3                      | 9598.8177                    | 0.0007                            |
| 6         | 1                     | 6                     | 5          | 0                      | 5                      | 5554.4052                    | 0.0014                            |
| 6         | 2                     | 5                     | 5          | 1                      | 4                      | 8378.6178                    | 0.0021                            |
| 6         | 2                     | 4                     | 5          | 1                      | 5                      | 8870.3719                    | 0.0020                            |
| 6         | 3                     | 4                     | 5          | 2                      | 3                      | 11339.9125                   | -0.0014                           |
| 6         | 3                     | 3                     | 5          | 2                      | 4                      | 11358.0360                   | -0.0020                           |
| 6         | 4                     | 3                     | 5          | 3                      | 2                      | 14093.7837                   | 0.0001                            |
| 6         | 4                     | 2                     | 5          | 3                      | 3                      | 14093.9309                   | -0.0023                           |
| 6         | 5                     | 2                     | 5          | 4                      | 1                      | 16837.0672                   | 0.0007                            |
| 6         | 5                     | 1                     | 5          | 4                      | 2                      | 16837.0672                   | 0.0003                            |
| 6         | 6                     | 1                     | 5          | 5                      | 0                      | 19579.9666                   | 0.0015                            |
| 6         | 6                     | 0                     | 5          | 5                      | 1                      | 19579.9666                   | 0.0015                            |
| 7         | 3                     | 5                     | 7          | 2                      | 6                      | 6875.6328                    | -0.0010                           |
| 7         | 3                     | 4                     | 7          | 2                      | 5                      | 6813.5623                    | 0.0008                            |

|    |   |    |    |   |    |            |         |
|----|---|----|----|---|----|------------|---------|
| 7  | 4 | 4  | 7  | 3 | 5  | 9597.8681  | 0.0003  |
| 7  | 4 | 3  | 7  | 3 | 4  | 9596.7693  | -0.0010 |
| 7  | 1 | 7  | 6  | 0 | 6  | 6207.7711  | -0.0006 |
| 7  | 2 | 6  | 6  | 1 | 5  | 9036.2044  | 0.0015  |
| 7  | 2 | 5  | 6  | 1 | 6  | 9738.2332  | 0.0018  |
| 7  | 3 | 5  | 6  | 2 | 4  | 12077.1390 | -0.0020 |
| 7  | 3 | 4  | 6  | 2 | 5  | 12113.5039 | -0.0021 |
| 7  | 4 | 4  | 6  | 3 | 3  | 14841.9982 | -0.0009 |
| 7  | 4 | 3  | 6  | 3 | 4  | 14842.4494 | 0.0004  |
| 7  | 5 | 3  | 6  | 4 | 2  | 17585.7627 | 0.0009  |
| 7  | 5 | 2  | 6  | 4 | 3  | 17585.7627 | -0.0012 |
| 8  | 4 | 5  | 8  | 3 | 6  | 9595.9608  | -0.0004 |
| 8  | 4 | 4  | 8  | 3 | 5  | 9593.5519  | -0.0039 |
| 8  | 1 | 8  | 7  | 0 | 7  | 6853.0989  | 0.0036  |
| 8  | 2 | 7  | 7  | 1 | 6  | 9679.1001  | 0.0023  |
| 8  | 2 | 6  | 7  | 1 | 7  | 10634.9626 | -0.0028 |
| 8  | 3 | 6  | 7  | 2 | 5  | 12807.2232 | -0.0005 |
| 8  | 3 | 5  | 7  | 2 | 6  | 12872.8291 | 0.0002  |
| 8  | 4 | 5  | 7  | 3 | 4  | 15589.6236 | 0.0002  |
| 8  | 4 | 4  | 7  | 3 | 5  | 15590.7502 | -0.0007 |
| 8  | 5 | 4  | 7  | 4 | 3  | 18334.3193 | -0.0033 |
| 8  | 5 | 3  | 7  | 4 | 4  | 18334.3341 | 0.0039  |
| 9  | 0 | 9  | 8  | 1 | 8  | 5774.5909  | -0.0051 |
| 9  | 1 | 9  | 8  | 0 | 8  | 7492.7310  | -0.0016 |
| 9  | 2 | 8  | 8  | 1 | 7  | 10307.6657 | -0.0008 |
| 9  | 2 | 7  | 8  | 1 | 8  | 11563.9717 | -0.0019 |
| 9  | 3 | 7  | 8  | 2 | 6  | 13527.8900 | -0.0007 |
| 9  | 3 | 6  | 8  | 2 | 7  | 13637.3273 | 0.0006  |
| 9  | 4 | 6  | 8  | 3 | 5  | 16336.3250 | -0.0019 |
| 9  | 4 | 5  | 8  | 3 | 6  | 16338.8122 | -0.0011 |
| 9  | 5 | 5  | 8  | 4 | 4  | 19082.6805 | 0.0034  |
| 9  | 5 | 4  | 8  | 4 | 5  | 19082.6979 | -0.0020 |
| 10 | 0 | 10 | 9  | 1 | 9  | 6595.1853  | -0.0006 |
| 10 | 1 | 10 | 9  | 0 | 9  | 8129.1794  | 0.0007  |
| 10 | 2 | 9  | 9  | 1 | 8  | 10922.3964 | -0.0009 |
| 10 | 2 | 8  | 9  | 1 | 9  | 12528.6503 | 0.0034  |
| 10 | 3 | 8  | 9  | 2 | 7  | 14236.7570 | -0.0004 |
| 10 | 3 | 7  | 9  | 2 | 8  | 14408.5607 | -0.0007 |
| 10 | 4 | 7  | 9  | 3 | 6  | 17081.6739 | 0.0028  |
| 10 | 4 | 6  | 9  | 3 | 7  | 17086.6542 | -0.0002 |
| 11 | 0 | 11 | 10 | 1 | 10 | 7412.3740  | -0.0023 |
| 11 | 1 | 11 | 10 | 0 | 10 | 8764.9258  | 0.0009  |
| 11 | 2 | 10 | 10 | 1 | 9  | 11523.9223 | -0.0015 |
| 11 | 2 | 9  | 10 | 1 | 10 | 13532.1725 | 0.0001  |

|    |   |    |    |   |    |            |         |
|----|---|----|----|---|----|------------|---------|
| 11 | 3 | 9  | 10 | 2 | 8  | 14931.4703 | 0.0001  |
| 11 | 3 | 8  | 10 | 2 | 9  | 15188.3573 | 0.0003  |
| 11 | 4 | 8  | 10 | 3 | 7  | 17825.0829 | -0.0020 |
| 11 | 4 | 7  | 10 | 3 | 8  | 17834.3571 | 0.0011  |
| 12 | 0 | 12 | 11 | 1 | 11 | 8224.1447  | -0.0006 |
| 12 | 1 | 12 | 11 | 0 | 11 | 9402.3030  | 0.0015  |
| 12 | 3 | 10 | 11 | 2 | 9  | 15609.8614 | -0.0048 |
| 12 | 3 | 9  | 11 | 2 | 10 | 15978.8227 | 0.0037  |
| 12 | 4 | 9  | 11 | 3 | 8  | 18565.8408 | 0.0008  |
| 12 | 4 | 8  | 11 | 3 | 9  | 18582.0861 | 0.0014  |
| 13 | 0 | 13 | 12 | 1 | 12 | 9028.9272  | 0.0000  |
| 13 | 1 | 13 | 12 | 0 | 12 | 10043.3295 | 0.0012  |
| 7  | 0 | 7  | 6  | 0 | 6  | 5212.7956  | -0.0017 |
| 7  | 1 | 7  | 6  | 1 | 6  | 5127.8438  | -0.0039 |
| 7  | 1 | 6  | 6  | 1 | 5  | 5340.2744  | -0.0009 |
| 8  | 0 | 8  | 7  | 0 | 7  | 5947.9481  | 0.0021  |
| 8  | 1 | 8  | 7  | 1 | 7  | 5858.1223  | 0.0013  |
| 8  | 1 | 7  | 7  | 1 | 6  | 6100.3249  | -0.0001 |
| 9  | 0 | 9  | 8  | 0 | 8  | 6679.7441  | -0.0012 |
| 9  | 1 | 9  | 8  | 1 | 8  | 6587.5853  | 0.0020  |
| 9  | 1 | 8  | 8  | 1 | 7  | 6859.1248  | -0.0009 |
| 10 | 0 | 10 | 9  | 0 | 9  | 7408.1737  | 0.0005  |
| 10 | 1 | 10 | 9  | 1 | 9  | 7316.1918  | 0.0004  |
| 10 | 1 | 9  | 9  | 1 | 8  | 7616.4532  | 0.0003  |
| 11 | 0 | 11 | 10 | 0 | 10 | 8133.3824  | 0.0006  |
| 11 | 1 | 11 | 10 | 1 | 10 | 8043.9193  | -0.0002 |
| 11 | 1 | 10 | 10 | 1 | 9  | 8372.0619  | 0.0019  |
| 12 | 0 | 12 | 11 | 0 | 11 | 8855.6901  | 0.0017  |
| 12 | 1 | 12 | 11 | 1 | 11 | 8770.7572  | -0.0012 |
| 12 | 1 | 11 | 11 | 1 | 10 | 9125.6765  | -0.0021 |

---

**Table S4.** Measured transition frequencies of the three observed  $^{13}\text{C}$  isotopic species of  $\text{C}_2\text{F}_4\text{S}_2$ -DFM.

| $J'$ | $K_a'$ | $K_c'$ | $J''$ | $K_a''$ | $K_c''$ | $^{13}\text{C-C1}$            |                                          | $^{13}\text{C-C5}$            |                                          | $^{13}\text{C-C10}$           |                                          |
|------|--------|--------|-------|---------|---------|-------------------------------|------------------------------------------|-------------------------------|------------------------------------------|-------------------------------|------------------------------------------|
|      |        |        |       |         |         | $\nu_{\text{obs}}/\text{MHz}$ | $\Delta\nu_{\text{obs-calc}}/\text{MHz}$ | $\nu_{\text{obs}}/\text{MHz}$ | $\Delta\nu_{\text{obs-calc}}/\text{MHz}$ | $\nu_{\text{obs}}/\text{MHz}$ | $\Delta\nu_{\text{obs-calc}}/\text{MHz}$ |
| 4    | 4      | 1      | 3     | 3       | 0       | 12585.9847                    | -0.0002                                  | 12574.1450                    | 0.0020                                   | 12591.9739                    | -0.0013                                  |
| 4    | 4      | 0      | 3     | 3       | 1       | 12585.9902                    | 0.0001                                   | 12574.1503                    | 0.0019                                   | 12591.9792                    | -0.0010                                  |
| 5    | 4      | 2      | 4     | 3       | 1       | 13332.1151                    | -0.0042                                  | 13322.7542                    | -0.0009                                  | 13334.0614                    | -0.0042                                  |
| 5    | 4      | 1      | 4     | 3       | 2       | 13332.1592                    | 0.0032                                   | 13322.7966                    | 0.0036                                   | 13334.1022                    | 0.0014                                   |
| 5    | 5      | 1      | 4     | 4       | 0       | 16075.1840                    | -0.0015                                  | 16059.6043                    | -0.0020                                  | 16083.4657                    | 0.0006                                   |
| 5    | 5      | 0      | 4     | 4       | 1       | 16075.1840                    | -0.0015                                  | 16059.6043                    | -0.0020                                  | 16083.4657                    | 0.0006                                   |
| 6    | 4      | 3      | 5     | 3       | 2       | 14078.0714                    | -0.0034                                  | 14071.1842                    | 0.0002                                   | 14075.9804                    | -0.0020                                  |
| 6    | 4      | 2      | 5     | 3       | 3       | 14078.2244                    | 0.0023                                   | 14071.3327                    | -0.0036                                  | 14076.1228                    | -0.0007                                  |
| 6    | 5      | 2      | 5     | 4       | 1       | 16821.3485                    | 0.0035                                   | 16808.2450                    | 0.0005                                   | 16825.5777                    | -0.0015                                  |
| 6    | 5      | 1      | 5     | 4       | 2       | 16821.3485                    | 0.0031                                   | 16808.2450                    | 0.0000                                   | 16825.5777                    | -0.0019                                  |
| 7    | 4      | 4      | 6     | 3       | 3       | 14823.6857                    | 0.0021                                   | 14819.2608                    | 0.0028                                   | 14817.5658                    | 0.0023                                   |
| 7    | 4      | 3      | 6     | 3       | 4       | 14824.1262                    | -0.0007                                  | 14819.7140                    | -0.0021                                  | 14817.9932                    | 0.0055                                   |
| 7    | 5      | 3      | 6     | 4       | 2       | 17567.4285                    | 0.0004                                   | 17556.8046                    | -0.0003                                  | 17567.6229                    | 0.0042                                   |
| 7    | 5      | 2      | 6     | 4       | 3       | 17567.4285                    | -0.0016                                  | 17556.8046                    | -0.0025                                  | 17567.6229                    | 0.0023                                   |
| 8    | 3      | 6      | 7     | 2       | 5       | 12786.6987                    | -0.0001                                  | 12790.1175                    | -0.0007                                  | 12771.3143                    | -0.0020                                  |
| 8    | 3      | 5      | 7     | 2       | 6       | 12851.6557                    | -0.0016                                  | 12856.4745                    | -0.0007                                  | 12834.4356                    | -0.0014                                  |
| 9    | 3      | 7      | 8     | 2       | 6       | 13505.0219                    | -0.0006                                  | 13510.3397                    | 0.0001                                   | 13486.3597                    | 0.0000                                   |
| 9    | 3      | 6      | 8     | 2       | 7       | 13613.3818                    | -0.0007                                  | 13621.0272                    | 0.0012                                   | 13591.6611                    | -0.0008                                  |
| 10   | 3      | 8      | 9     | 2       | 7       | 14211.6531                    | 0.0006                                   | 14218.6400                    | 0.0005                                   | 14190.0113                    | 0.0002                                   |
| 10   | 3      | 7      | 9     | 2       | 8       | 14381.7758                    | 0.0014                                   | 14392.3961                    | 0.0000                                   | 14355.3536                    | 0.0001                                   |



**Table S5.** Measured transition frequencies of the two observed  $^{34}\text{S}$  isotopic species of  $\text{C}_2\text{F}_4\text{S}_2$ -DFM.

| $J'$ | $K_a'$ | $K_c'$ | $J''$ | $K_a''$ | $K_c''$ | $^{34}\text{S-S4}$            |                                          | $^{34}\text{S-S8}$            |                                          |
|------|--------|--------|-------|---------|---------|-------------------------------|------------------------------------------|-------------------------------|------------------------------------------|
|      |        |        |       |         |         | $\nu_{\text{obs}}/\text{MHz}$ | $\Delta\nu_{\text{obs-calc}}/\text{MHz}$ | $\nu_{\text{obs}}/\text{MHz}$ | $\Delta\nu_{\text{obs-calc}}/\text{MHz}$ |
| 4    | 4      | 1      | 3     | 3       | 0       | 12453.8676                    | 0.0003                                   | 12505.4442                    | 0.0011                                   |
| 4    | 4      | 0      | 3     | 3       | 1       | 12453.8676                    | -0.0054                                  | 12505.4442                    | -0.0046                                  |
| 5    | 4      | 2      | 4     | 3       | 1       | 13198.0696                    | -0.0078                                  | 13253.4689                    | -0.0064                                  |
| 5    | 4      | 1      | 4     | 3       | 2       | 13198.1138                    | -0.0040                                  | 13253.5144                    | -0.0010                                  |
| 5    | 5      | 1      | 4     | 4       | 0       | 15905.6000                    | 0.0052                                   | 15971.3628                    | 0.0014                                   |
| 5    | 5      | 0      | 4     | 4       | 1       | 15905.6000                    | 0.0051                                   | 15971.3628                    | 0.0014                                   |
| 6    | 4      | 3      | 5     | 3       | 2       | 13942.0982                    | 0.0015                                   | 14001.3232                    | 0.0049                                   |
| 6    | 4      | 2      | 5     | 3       | 3       | 13942.2494                    | -0.0093                                  | 14001.4701                    | -0.0088                                  |
| 6    | 5      | 2      | 5     | 4       | 1       | 16649.8383                    | 0.0050                                   | 16719.4261                    | 0.0039                                   |
| 6    | 5      | 1      | 5     | 4       | 2       | 16649.8383                    | 0.0046                                   | 16719.4261                    | 0.0034                                   |
| 7    | 4      | 4      | 6     | 3       | 3       | 14685.7416                    | -0.0038                                  | 14748.7929                    | -0.0006                                  |
| 7    | 4      | 3      | 6     | 3       | 4       | 14686.2272                    | -0.0056                                  | 14749.2744                    | -0.0021                                  |
| 7    | 5      | 3      | 6     | 4       | 2       | 17393.9972                    | 0.0059                                   | 17467.4091                    | 0.0056                                   |
| 7    | 5      | 2      | 6     | 4       | 3       | 17393.9972                    | 0.0036                                   | 17467.4091                    | 0.0033                                   |
| 8    | 3      | 6      | 7     | 2       | 5       | 12679.9820                    | -0.0083                                  | 12736.6916                    | 0.0028                                   |
| 8    | 3      | 5      | 7     | 2       | 6       | 12748.9029                    | -0.0058                                  | 12805.2799                    | -0.0018                                  |
| 8    | 4      | 5      | 7     | 3       | 4       | 15428.7634                    | -0.0040                                  | 15495.6471                    | 0.0008                                   |
| 8    | 4      | 4      | 7     | 3       | 5       | 15429.9879                    | -0.0011                                  | 15496.8576                    | 0.0006                                   |
| 8    | 5      | 4      | 7     | 4       | 3       | 18138.0096                    | 0.0011                                   | 18215.2527                    | 0.0073                                   |
| 8    | 5      | 3      | 7     | 4       | 4       | 18138.0278                    | 0.0108                                   | 18215.2527                    | -0.0011                                  |
| 9    | 3      | 7      | 8     | 2       | 6       | 13394.7539                    | -0.0015                                  | 13455.4114                    | 0.0010                                   |
| 9    | 3      | 6      | 8     | 2       | 7       | 13509.6960                    | -0.0035                                  | 13569.8150                    | 0.0007                                   |
| 9    | 4      | 6      | 8     | 3       | 5       | 16170.8096                    | -0.0019                                  | 16241.5280                    | -0.0002                                  |
| 9    | 4      | 5      | 8     | 3       | 6       | 16173.5056                    | 0.0002                                   | 16244.1967                    | -0.0014                                  |
| 10   | 3      | 8      | 9     | 2       | 7       | 14097.1910                    | -0.0008                                  | 14161.8536                    | 0.0007                                   |
| 10   | 3      | 7      | 9     | 2       | 8       | 14277.5915                    | -0.0014                                  | 14341.4137                    | 0.0004                                   |
| 10   | 4      | 7      | 9     | 3       | 6       | 16911.4108                    | 0.0017                                   | 16985.9740                    | 0.0000                                   |
| 10   | 4      | 6      | 9     | 3       | 7       | 16916.8118                    | 0.0032                                   | 16991.3260                    | 0.0008                                   |
| 11   | 3      | 9      | 10    | 2       | 8       | 14784.8865                    | 0.0036                                   | 14853.6033                    | -0.0004                                  |
| 11   | 3      | 8      | 10    | 2       | 9       | 15054.5224                    | 0.0051                                   | 15121.9980                    | 0.0015                                   |
| 11   | 4      | 8      | 10    | 3       | 7       | 17649.9541                    | 0.0048                                   | 17728.3754                    | -0.0018                                  |
| 11   | 4      | 7      | 10    | 3       | 8       | 17659.9979                    | 0.0034                                   | 17738.3299                    | -0.0026                                  |

**Table S6.** Experimental ( $r_s$  and  $r_0$ ) and theoretical ( $r_e$ ) coordinates of the three C and two S atoms for the observed conformer of C<sub>2</sub>F<sub>4</sub>S<sub>2</sub>-DFM.

| Atom |       | $a/\text{Å}$      | $b/\text{Å}$   |
|------|-------|-------------------|----------------|
| C1   | $r_s$ | $\pm 2.1513(7)^a$ | $\pm 0.468(3)$ |
|      | $r_e$ | 2.1670            | -0.451         |
|      | $r_0$ | 2.1681            | -0.469         |
| C5   | $r_s$ | $\pm 0.085(18)$   | $\pm 0.727(2)$ |
|      | $r_e$ | 0.103             | 0.701          |
|      | $r_0$ | 0.070             | 0.726          |
| C10  | $r_s$ | $\pm 3.4732(4)$   | $\pm 0.167(9)$ |
|      | $r_e$ | -3.4705           | 0.145          |
|      | $r_0$ | -3.4683           | 0.125          |
| S4   | $r_s$ | $\pm 1.8354(8)$   | $\pm 1.309(1)$ |
|      | $r_e$ | 1.8041            | 1.330          |
|      | $r_0$ | 1.8526            | 1.322          |
| S8   | $r_s$ | $\pm 0.389(4)$    | $\pm 1.046(1)$ |
|      | $r_e$ | 0.462             | -1.075         |
|      | $r_0$ | 0.447             | -1.047         |

<sup>a</sup> Costain's errors expressed in parentheses in units of the last digit.

**Table S7.** The  $r_0$  structure of conformer I of  $C_2F_4S_2$ -DFM in the principal inertial axis system.

|       | $a / \text{Å}$ | $b / \text{Å}$ | $c / \text{Å}$ |
|-------|----------------|----------------|----------------|
| F(1)  | -4.6940        | -0.4595        | 0.0000         |
| C(2)  | -3.4683        | 0.1251         | 0.0000         |
| H(3)  | -3.3520        | 0.7078         | 0.9125         |
| H(4)  | -3.3520        | 0.7078         | -0.9125        |
| F(5)  | -2.5232        | -0.8646        | 0.0000         |
| S(6)  | 0.4471         | -1.0473        | 0.0000         |
| C(7)  | 2.1681         | -0.4688        | 0.0000         |
| F(8)  | 2.8716         | -0.8836        | 1.0747         |
| F(9)  | 2.8716         | -0.8836        | -1.0747        |
| S(10) | 1.8526         | 1.3219         | 0.0000         |
| C(11) | 0.0702         | 0.7256         | 0.0000         |
| F(12) | -0.6317        | 1.1566         | 1.0744         |
| F(13) | -0.6317        | 1.1566         | -1.0744        |

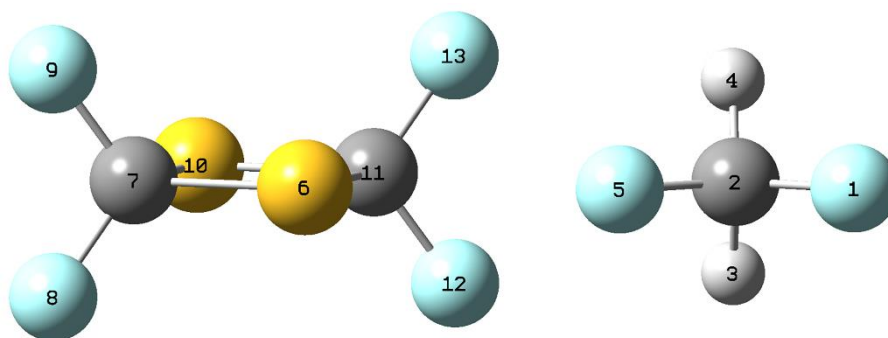

**Table S8.** Stabilization energy contributions ( $\geq 0.21$  kJ mol<sup>-1</sup>) for conformer I of the C<sub>2</sub>F<sub>4</sub>S<sub>2</sub>-DFM complex.

| Donor NBO                                                  | Acceptor NBO   | E(2) (kJ mol <sup>-1</sup> ) |
|------------------------------------------------------------|----------------|------------------------------|
| <b>From DFM to C<sub>2</sub>F<sub>4</sub>S<sub>2</sub></b> |                |                              |
| BD (1) F9 – C10                                            | RY*(2) C5      | 0.33                         |
| BD (1) F9 – C10                                            | RY*(3) C5      | 0.21                         |
| BD (1)C10 – H11                                            | RY*(1) F6      | 0.38                         |
| BD (1)C10 – H11                                            | RY*(2) F6      | 0.29                         |
| BD (1)C10 – H12                                            | RY*(1) F7      | 0.38                         |
| BD (1)C10 – H12                                            | RY*(2) F6      | 0.29                         |
| LP (1) F9                                                  | BD*(1) C1 – S8 | 1.42                         |
| LP (1) F9                                                  | BD*(1) S4 – C5 | 0.33                         |
| LP (1) F9                                                  | BD*(1) C5– S8  | 0.29                         |
| LP (3) F9                                                  | BD*(1) C1 – S8 | 1.51                         |
| LP (3) F9                                                  | BD*(1) S4 – C5 | 1.42                         |
| LP (3) F9                                                  | BD*(1) C5 – F6 | 0.50                         |
| LP (3) F9                                                  | BD*(1) C5 – F7 | 0.50                         |
| <b>From C<sub>2</sub>F<sub>4</sub>S<sub>2</sub> to DFM</b> |                |                              |
| BD (1) S4 – C5                                             | RY*(1) C10     | 0.38                         |
| LP (2) F6                                                  | RY*(1) H11     | 0.29                         |
| LP (2) F7                                                  | RY*(1) H12     | 0.29                         |

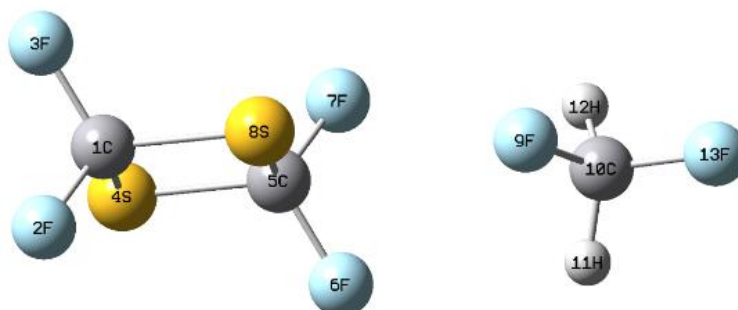

**Table S9.** NPA charge distributions for conformer I of C<sub>2</sub>F<sub>4</sub>S<sub>2</sub>-DFM complex, and isolated C<sub>2</sub>F<sub>4</sub>S<sub>2</sub> and DFM molecules. Bold values highlight the charges of the sulfur and fluorine atoms involved in the charge transfer.

|          | C <sub>2</sub> F <sub>4</sub> S <sub>2</sub> -DFM-I | C <sub>2</sub> F <sub>4</sub> S <sub>2</sub> | DFM           |
|----------|-----------------------------------------------------|----------------------------------------------|---------------|
| C        | 0.432                                               | 0.435                                        |               |
| F        | -0.342                                              | -0.341                                       |               |
| F        | -0.342                                              | -0.341                                       |               |
| S        | 0.248                                               | 0.247                                        |               |
| C        | 0.426                                               | 0.435                                        |               |
| F        | -0.350                                              | -0.341                                       |               |
| F        | -0.350                                              | -0.341                                       |               |
| <b>S</b> | <b>0.274</b>                                        | <b>0.247</b>                                 |               |
| <b>F</b> | <b>-0.369</b>                                       |                                              | <b>-0.356</b> |
| C        | 0.462                                               |                                              | 0.463         |
| H        | 0.132                                               |                                              | 0.125         |
| H        | 0.132                                               |                                              | 0.125         |
| F        | -0.353                                              |                                              | -0.356        |
